# Supplementary material for: Clinical characteristics and serological profiles of Lyme disease in children: a 15-year retrospective cohort study in Switzerland
Source: PubMed Central journal article supplement (PMC11683244; doi:10.1016/j.lanepe.2024.101143), 2024-12-09

## Supplementary data

### Table of contents

|                  |                                                                                                                                                                                     |         |
|------------------|-------------------------------------------------------------------------------------------------------------------------------------------------------------------------------------|---------|
| <b>Table S1:</b> | Clinical characteristics of peripheral facial nerve palsy at presentation of the whole cohort                                                                                       | Page 2  |
| <b>Table S2</b>  | Demographic characteristics and clinical presentation of the subcohort of 254 patients with Lyme disease and complete Western blot results for all 8 <i>B. burgdorferi</i> antigens | Page 3  |
| <b>Table S3</b>  | Treatment and clinical outcome of the subcohort of 254 patients with Lyme disease and complete Western blot results for all 8 <i>B. burgdorferi</i> antigens                        | Page 6  |
| <b>Table S4</b>  | Western blot band intensity score (0–4) of the subcohort of 254 patients with Lyme disease and complete Western blot results for all 8 <i>B. burgdorferi</i> antigens               | Page 8  |
| <b>Figure S1</b> | Presence of constitutional symptoms of the whole cohort of 469 patients with different manifestations of Lyme disease                                                               | Page 10 |
| <b>Figure S2</b> | White blood cell count and C-reactive protein levels of the whole cohort of 469 patients with different manifestations of Lyme disease                                              | Page 11 |

**Supplementary Table S1.** Clinical characteristics of peripheral facial nerve palsy at presentation of the whole cohort.

| Clinical characteristics of peripheral facial nerve palsy (FP) | <i>n</i> <sup>1</sup> |
|----------------------------------------------------------------|-----------------------|
| <b>Total</b>                                                   |                       |
|                                                                | 136 <sup>a</sup>      |
| <b>Side</b>                                                    |                       |
| Right                                                          | 70 (51.0%)            |
| Left                                                           | 62 (46.0%)            |
| Bilateral                                                      | 3 (2.2%)              |
| NA                                                             | 1 (0.7%)              |
| <b>Grading with House-Brackmann classification</b>             |                       |
| II mild dysfunction                                            | 12 (8.8%)             |
| III moderate dysfunction                                       | 31 (23.0%)            |
| IV moderately severe dysfunction, incomplete eye closure       | 71 (52.0%)            |
| V severe dysfunction                                           | 17 (13.0%)            |
| NA                                                             | 5 (3.7%)              |

Categorical variables are summarized as no. (%).

**Abbreviations:** FP, peripheral facial nerve palsy; NA, not available.

<sup>a</sup> Including isolated FP (*n*=63; defined as FP without any other medical symptoms and signs such as headache, fever, nuchal rigidity etc.), FP with meningitis (*n*=69), FP with (meningo-)radiculitis (*n*=3), and FP with cerebral vasculitis (*n*=1) (**Table 1**).

**Supplementary Table S2.** Demographic characteristics and clinical presentation of the subcohort of 254 patients with Lyme disease and complete Western blot results for all 8 *B. burgdorferi* antigens.

| Characteristics                       | Total<br>(n=254) | Skin<br>(n=30) | LNB<br>(n=143) | Arthritis<br>(n=81) |
|---------------------------------------|------------------|----------------|----------------|---------------------|
| <b>Demographic characteristics</b>    |                  |                |                |                     |
| Age (years)                           | 8.3 (6.0,10.8)   | 7.1 (4.5,10.5) | 7.6 (5.8,9.8)  | 10.1 (8.3,12.3)     |
| Sex, male                             | 154 (60.6%)      | 20 (66.7%)     | 86 (60.1%)     | 48 (59.3%)          |
| Underlying disease                    | 33 (13.0%)       | 6 (20.7%)      | 16 (11.2%)     | 11 (13.6%)          |
| Underlying disease                    |                  |                |                |                     |
| Primary or secondary immunodeficiency | 0 (0%)           | 0 (0%)         | 0 (0%)         | 0 (0%)              |
| Neurological                          | 9 (27.3%)        | 1 (16.7%)      | 6 (37.5%)      | 2 (18.2%)           |
| Cardiovascular                        | 2 (6.1%)         | 0 (0.0%)       | 1 (6.3%)       | 1 (9.1%)            |
| Pulmonary                             | 5 (15.2%)        | 2 (33.3%)      | 2 (12.5%)      | 1 (9.1%)            |
| Gastrointestinal                      | 2 (6.1%)         | 0 (0.0%)       | 1 (6.3%)       | 1 (9.1%)            |
| Others                                | 15 (45.5%)       | 3 (50.0%)      | 6 (37.5%)      | 6 (54.5%)           |
| No underlying disease                 | 221              | 24             | 127            | 70                  |
| Exposition to tick bite               |                  |                |                |                     |
| Farm                                  | 3 (5.8%)         | 2 (15.4%)      | 0 (0.0%)       | 1 (16.7%)           |
| Forest                                | 29 (55.8%)       | 5 (38.5%)      | 21 (63.6%)     | 3 (50.0%)           |
| Garden                                | 3 (5.8%)         | 0 (0.0%)       | 3 (9.1%)       | 0 (0.0%)            |
| Hiking                                | 2 (3.8%)         | 0 (0.0%)       | 2 (6.1%)       | 0 (0.0%)            |
| Scout                                 | 0 (0.0%)         | 0 (0.0%)       | 0 (0.0%)       | 0 (0.0%)            |
| Unknown exposition                    | 15 (28.8%)       | 6 (46.2%)      | 7 (21.2%)      | 2 (33.3%)           |
| NA                                    | 202              | 17             | 110            | 75                  |
| Tick bite recognized                  | 103 (40.6%)      | 15 (51.7%)     | 65 (45.5%)     | 23 (28.8%)          |
| Location of recognized tick bite      |                  |                |                |                     |
| Head/neck                             | 22 (21.4%)       | 6 (40.0%)      | 16 (24.6%)     | 0 (0.0%)            |
| Trunk                                 | 11 (10.7%)       | 0 (0.0%)       | 11 (16.9%)     | 0 (0.0%)            |
| Upper limb                            | 2 (1.9%)         | 1 (6.7%)       | 1 (1.5%)       | 0 (0.0%)            |
| Lower limb                            | 1 (1.0%)         | 0 (0.0%)       | 1 (1.5%)       | 0 (0.0%)            |
| Multiple tick bites                   | 6 (5.8%)         | 2 (13.3%)      | 2 (3.1%)       | 2 (8.7%)            |
| Unknown localization                  | 61 (59.2%)       | 6 (40.0%)      | 34 (52.3%)     | 21 (91.3%)          |

| Characteristics                                          | Total<br>(n=254)     | Skin<br>(n=30)         | LNB<br>(n=143)          | Arthritis<br>(n=81)    |
|----------------------------------------------------------|----------------------|------------------------|-------------------------|------------------------|
| NA                                                       | 151                  | 15                     | 78                      | 58                     |
| EM recognized                                            | 29 (11.4%)           | 6 (20.0%)              | 22 (15.4%)              | 1 (1.2%)               |
| Location of recognized EM                                |                      |                        |                         |                        |
| Head/neck                                                | 15 (51.7%)           | 3 (50.0%)              | 12 (54.5%)              | 0 (0.0%)               |
| Trunk                                                    | 7 (24.1%)            | 2 (33.3%)              | 5 (22.7%)               | 0 (0.0%)               |
| Upper limb                                               | 0 (0.0%)             | 0 (0.0%)               | 0 (0.0%)                | 0 (0.0%)               |
| Lower limb                                               | 0 (0.0%)             | 0 (0.0%)               | 0 (0.0%)                | 0 (0.0%)               |
| Multiple EM                                              | 4 (13.8%)            | 1 (16.7%)              | 3 (13.6%)               | 0 (0.0%)               |
| Unknown localization                                     | 3 (10.3%)            | 0 (0.0%)               | 2 (9.1%)                | 1 (100.0%)             |
| NA                                                       | 225                  | 24                     | 121                     | 80                     |
| <b>Clinical presentation</b>                             |                      |                        |                         |                        |
| Time from recognized tick bite to ED presentation (days) | 43.0<br>(30.0,300.0) | 60.0<br>(43.0,120.0)   | 30.0<br>(27.0,60.0)     | 360.0<br>(140.0,720.0) |
| NA                                                       | 167                  | 19                     | 84                      | 64                     |
| Time from symptom onset to ED presentation (days)        | 7.0 (3.0,21.0)       | 71.5<br>(34.0,140.0)   | 7.0 (3.0,14.0)          | 3.0 (2.0,10.0)         |
| Fever                                                    | 43 (16.9%)           | 3 (10.0%)              | 28 (19.6%)              | 12 (14.8%)             |
| Headache                                                 | 90 (35.4%)           | 1 (3.3%)               | 86 (60.1%)              | 3 (3.7%)               |
| Nausea/vomit                                             | 21 (8.3%)            | 0 (0.0%)               | 21 (14.7%)              | 0 (0.0%)               |
| Nuchal rigidity                                          | 26 (10.3%)           | 0 (0.0%)               | 26 (18.4%)              | 0 (0.0%)               |
| Scalp touch sensitive                                    | 9 (3.6%)             | 0 (0.0%)               | 9 (6.3%)                | 0 (0.0%)               |
| Fatigue                                                  | 50 (19.8%)           | 1 (3.3%)               | 49 (34.5%)              | 0 (0.0%)               |
| Change in behavior/character                             | 24 (9.4%)            | 1 (3.3%)               | 23 (16.1%)              | 0 (0.0%)               |
| EM at ED presentation                                    | 24 (9.4%)            | 5 (16.7%)              | 19 (13.3%)              | 0 (0.0%)               |
| Location of EM at ED presentation                        |                      |                        |                         |                        |
| Head/neck                                                | 16 (66.7%)           | 3 (60.0%) <sup>a</sup> | 13 (68.4%) <sup>a</sup> |                        |
| Trunk                                                    | 2 (8.3%)             | 0 (0.0%)               | 2 (10.5%)               |                        |
| Upper limb                                               | 2 (8.3%)             | 1 (20.0%)              | 1 (5.3%)                |                        |
| Lower limb                                               | 0 (0.0%)             | 0 (0.0%)               | 0 (0.0%)                |                        |
| Multiple EM                                              | 4 (16.7%)            | 1 (20.0%)              | 3 (15.8%)               |                        |
| Unknown localization                                     | 0 (0.0%)             | 0 (0.0%)               | 0 (0.0%)                |                        |
| NA                                                       | 230                  | 25                     | 124                     | 81                     |

| Characteristics                             | Total<br>(n=254) | Skin<br>(n=30) | LNB<br>(n=143) | Arthritis<br>(n=81) |
|---------------------------------------------|------------------|----------------|----------------|---------------------|
| Lymphocytoma at presentation                | 21 (8.3%)        | 20 (66.7%)     | 1 (0.7%)       | 0 (0.0%)            |
| Location of Lymphocytoma at ED presentation |                  |                |                |                     |
| Ear lobe                                    | 14 (66.7%)       | 13 (65.0%)     | 1 (100.0%)     |                     |
| Supraorbital                                | 2 (9.5%)         | 2 (10.0%)      | 0 (0.0%)       |                     |
| Mamilla                                     | 3 (14.3%)        | 3 (15.0%)      | 0 (0.0%)       |                     |
| Cheek                                       | 2 (9.5%)         | 2 (10.0%)      | 0 (0.0%)       |                     |
| Unknown localization                        | 0 (0.0%)         | 0 (0.0%)       | 0 (0.0%)       |                     |
| NA                                          | 233              | 10             | 142            | 81                  |

Continuous variables are summarized as median (1<sup>st</sup> quartile, 3<sup>rd</sup> quartile), categorical variables as no.

**Abbreviations:** ED, emergency department; EM, erythema migrans; LNB, Lyme neuroborreliosis; NA, not available.

<sup>a</sup> Including erythema on the cheeks (which resembles slapped-cheek rash from fifth disease due to parvovirus B19 infection).

**Supplementary Table S3.** Treatment and clinical outcome of the subcohort of 254 patients with Lyme disease and complete Western blot results for all 8 *B. burgdorferi* antigens.

| Characteristic                                                                     | Total<br>(n=254)    | Skin<br>(n=30)       | LNB<br>(n=143)      | Arthritis<br>(n=81) |
|------------------------------------------------------------------------------------|---------------------|----------------------|---------------------|---------------------|
| <b>Treatment</b>                                                                   |                     |                      |                     |                     |
| Prior antibiotic treatment for LD                                                  | 15 (5.9%)           | 2 (6.7%)             | 10 (7.0%)           | 3 (3.7%)            |
| Prior antibiotic treatment duration (days)                                         | 4.0 (3.0,7.0)       | 9.5 (7.0,12.0)       | 4.0 (3.0,5.0)       | 12.0 (4.0,20.0)     |
| NA                                                                                 | 241                 | 28                   | 134                 | 79                  |
| Time from symptom onset to start of antibiotic treatment after presentation (days) | 19.0<br>(12.0,35.0) | 78.5<br>(34.0,142.0) | 19.0<br>(13.0,30.0) | 12.5<br>(9.0,25.0)  |
| NA                                                                                 | 13                  | 2                    | 10                  | 1                   |
| Antibiotic treatment after presentation                                            |                     |                      |                     |                     |
| Amoxicillin PO                                                                     | 34 (13.9%)          | 22 (75.9%)           | 0 (0.0%)            | 12 (14.8%)          |
| Ceftriaxone IV <sup>a</sup>                                                        | 110 (45.1%)         | 0 (0.0%)             | 106 (79.1%)         | 4 (4.9%)            |
| Doxycycline PO                                                                     | 100 (41.0%)         | 7 (24.1%)            | 28 (20.9%)          | 65 (80.2%)          |
| Other antibiotic treatment                                                         | 0 (0.0%)            | 0 (0.0%)             | 0 (0.0%)            | 0 (0.0%)            |
| NA                                                                                 | 10                  | 1                    | 9                   | 0                   |
| Antibiotic treatment duration (days)                                               | 21.0<br>(14.0,28.0) | 21.0<br>(14.0,21.0)  | 21.0<br>(14.0,21.0) | 28.0<br>(28.0,28.0) |
| NA                                                                                 | 11                  | 1                    | 10                  | 0                   |
| Side effects <sup>b</sup>                                                          |                     |                      |                     |                     |
| Amoxicillin                                                                        | 0 (0.0%)            |                      | 0 (0.0%)            |                     |
| Ceftriaxone                                                                        | 15 (6.1%)           |                      | 15 (11.2%)          |                     |
| Amoxicillin with clavulanic acid                                                   | 0 (0.0%)            |                      | 0 (0.0%)            |                     |
| Doxycycline                                                                        | 0 (0%)              |                      | 0 (0%)              |                     |
| No side effects                                                                    | 229 (93.9%)         | 30 (100.0%)          | 119 (88.8%)         | 81 (100.0%)         |
| NA                                                                                 | 10                  | 1                    | 9                   | 0                   |
| Change of antibiotics                                                              |                     |                      |                     |                     |
| to Doxycycline                                                                     | 3 (75.0%)           |                      | 3 (75.0%)           |                     |
| to Penicillin                                                                      | 1 (25.0%)           |                      | 1 (25.0%)           |                     |
| NA                                                                                 | 250                 | 30                   | 139                 | 81                  |
| Prior corticosteroid treatment                                                     | 8 (3.1%)            | 0 (0.0%)             | 8 (5.6%)            | 0 (0%)              |

| Characteristic                           | Total<br>(n=254)    | Skin<br>(n=30)                    | LNB<br>(n=143)          | Arthritis<br>(n=81)  |
|------------------------------------------|---------------------|-----------------------------------|-------------------------|----------------------|
| Corticosteroids at presentation          | 86 (33.9%)          |                                   | 86 (62.3%) <sup>c</sup> |                      |
| <b>Clinical outcome</b>                  |                     |                                   |                         |                      |
| Hospitalization                          | 31 (12.2%)          | 0 (0.0%)                          | 7 (4.9%)                | 24 (29.6%)           |
| Duration of hospital stay (days)         | 5.0 (3.0,7.0)       |                                   | 6.0 (3.0,10.0)          | 5.0 (3.0,6.0)        |
| NA                                       | 223                 | 30                                | 136                     | 57                   |
| Total duration of symptoms (days)        | 40.5<br>(24.0,64.0) | 50.5<br>(34.0,132.5) <sup>d</sup> | 33.0<br>(23.0,54.0)     | 45.0<br>(30.0,108.0) |
| NA                                       | 84                  | 18                                | 56                      | 10                   |
| Presence of prolonged symptoms           |                     |                                   |                         |                      |
| 2 to 3 months                            | 1 (5.3%)            | 0 (0.0%)                          |                         | 1 (6.7%)             |
| 4 to 6 months                            | 8 (42.1%)           | 3 (75.0%)                         |                         | 5 (33.3%)            |
| >6 months                                | 10 (52.6%)          | 1 (25.0%)                         |                         | 9 (60.0%)            |
| No prolonged symptoms                    | 198 (91.2%)         | 21 (84.0%)                        | 114 (100.0%)            | 63 (80.8%)           |
| NA                                       | 235                 | 26                                | 143                     | 66                   |
| Clinical outcome at last follow-up visit |                     |                                   |                         |                      |
| Full recovery                            | 217 (99.5%)         | 25 (100.0%)                       | 114 (99.1%)             | 78 (100.0%)          |
| Abnormal clinical outcome <sup>e</sup>   | 1 (0.5%)            | 0 (0.0%)                          | 1 (0.9%)                | 0 (0.0%)             |
| NA                                       | 36                  | 5                                 | 28                      | 3                    |

Continuous variables are summarized as median (1<sup>st</sup> quartile, 3<sup>rd</sup> quartile), categorical variables as no.

**Abbreviations:** LD, Lyme disease; IV, intravenous; LNB, Lyme neuroborreliosis; NA, not available; PO, peroral.

- <sup>a</sup> Ceftriaxone IV once daily was administered on an outpatient basis at our day clinic for the entire duration of the study, unless the patient's general condition was severely compromised and required hospitalisation with monitoring.
- <sup>b</sup> Ceftriaxone: exanthema (*n*=8), angioedema (*n*=1), fever (*n*=2), neutropenia (*n*=3), elevated transaminases (*n*=1).
- <sup>c</sup> According to treatment recommendations indicated for and administered to the following patients: cranial neuropathies (if ≤5 days of symptoms), *n*=84; meningoradiculitis, *n*=1; and myelitis, *n*=1 (table 1).
- <sup>d</sup> EM (*n*=3), 34 (28–38); lymphocytoma (*n*=8), 55 (43–128); acrodermatitis chronica atrophicans (*n*=1), 437 (437–437).
- <sup>e</sup> Abnormal clinical outcome: cerebral vasculitis with cerebrovascular insult (*n*=1).

**Supplementary Table S4.** Western blot band intensity score (0–4) of the subcohort of 254 patients with Lyme disease and complete Western blot results for all 8 *B. burgdorferi* antigens.

| Characteristic | Total<br>(n=254) | Skin<br>(n=30) | LNB<br>(n=143) | Arthritis<br>(n=81) | p-value |
|----------------|------------------|----------------|----------------|---------------------|---------|
| <b>IgM</b>     |                  |                |                |                     |         |
| IgM p100       | 0 (0,0)          | 0 (0,1)        | 0 (0,0)        | 0 (0,1)             | 0.083   |
| NA             | 60               | 11             | 1              | 48                  |         |
| IgM VlsE       | 0 (0,1)          | 0 (0,0)        | 0 (0,2)        | 0 (0,1)             | 0.038   |
| NA             | 60               | 11             | 1              | 48                  |         |
| IgM p58        | 0 (0,0)          | 0 (0,0)        | 0 (0,0)        | 0 (0,0)             | 0.055   |
| NA             | 60               | 11             | 1              | 48                  |         |
| IgM p41        | 2 (1,3)          | 1 (0,2)        | 3 (2,3)        | 1 (0,2)             | <0.0001 |
| NA             | 60               | 11             | 1              | 48                  |         |
| IgM p39        | 0 (0,1)          | 0 (0,0)        | 0 (0,1)        | 0 (0,0)             | 0.43    |
| NA             | 60               | 11             | 1              | 48                  |         |
| IgM OspA       | 0 (0,0)          | 0 (0,0)        | 0 (0,0)        | 0 (0,0)             | 0.67    |
| NA             | 60               | 11             | 1              | 48                  |         |
| IgM OspC       | 1 (1,3)          | 1 (0,2)        | 2 (1,3)        | 1 (0,2)             | 0.015   |
| NA             | 60               | 11             | 1              | 48                  |         |
| IgM p18        | 0 (0,0)          | 0 (0,0)        | 0 (0,0)        | 0 (0,0)             | 0.20    |
| NA             | 60               | 11             | 1              | 48                  |         |
| <b>IgG</b>     |                  |                |                |                     |         |
| IgG p100       | 1 (0,3)          | 2 (0,3)        | 0 (0,0)        | 3 (3,3)             | <0.0001 |
| NA             | 6                | 0              | 6              | 0                   |         |
| IgG VlsE       | 3 (2,3)          | 3 (3,3)        | 2 (1,3)        | 3 (3,3)             | <0.0001 |
| NA             | 7                | 0              | 7              | 0                   |         |
| IgG p58        | 0 (0,2)          | 1 (1,2)        | 0 (0,0)        | 3 (2,3)             | <0.0001 |
| NA             | 7                | 0              | 6              | 1                   |         |
| IgG p41        | 3 (2,3)          | 3 (2,3)        | 3 (2,3)        | 3 (2,3)             | 0.063   |
| NA             | 7                | 0              | 6              | 1                   |         |



| Characteristic | Total<br>(n=254) | Skin<br>(n=30) | LNB<br>(n=143) | Arthritis<br>(n=81) | p-value |
|----------------|------------------|----------------|----------------|---------------------|---------|
| IgG p39        | 1 (0,3)          | 1 (0,2)        | 0 (0,1)        | 3 (2,3)             | <0.0001 |
| NA             | 6                | 0              | 6              | 0                   |         |
| IgG OspC       | 1 (0,2)          | 0 (0,1)        | 1 (0,2)        | 0 (0,1)             | 0.0028  |
| NA             | 6                | 0              | 6              | 0                   |         |
| IgG OspA       | 0 (0,0)          | 0 (0,0)        | 0 (0,0)        | 0 (0,0)             | 0.079   |
| NA             | 6                | 0              | 6              | 0                   |         |
| IgG p18        | 1 (0,3)          | 3 (0,3)        | 0 (0,0)        | 3 (3,3)             | <0.0001 |
| NA             | 6                | 0              | 6              | 0                   |         |

Continuous variables are summarized as median (1st quartile, 3rd quartile). P-values were calculated by the Kruskal-Wallis rank sum test (continuous variables).

**Abbreviations:** Ig, immunoglobulin; LNB, Lyme neuroborreliosis; NA, not available.

**Supplementary Figure S1.** Presence of constitutional symptoms of the whole cohort of 469 patients with different manifestations of Lyme disease.

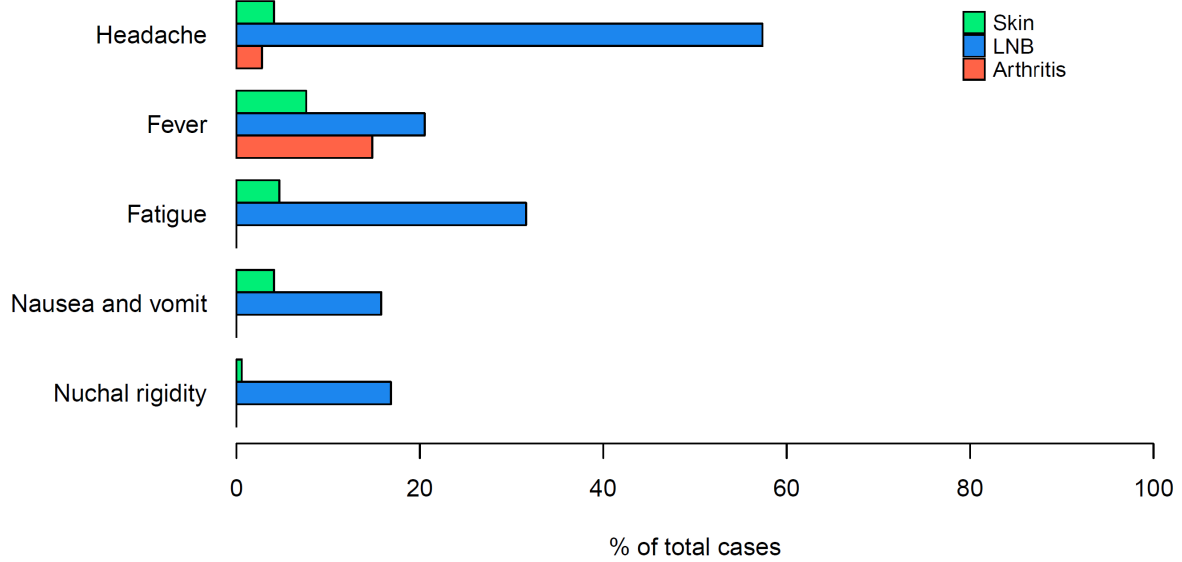

**Supplementary Figure S2.** White blood cell count and C-reactive protein levels of the whole cohort of 469 patients with different manifestations of Lyme disease. **A:** WBC count in blood. **B:** C-reactive protein (CRP) levels in blood. The median is shown as a black line across the box that represents the lower and upper quartiles. Whiskers extend to the maximum and minimum values within 1.5 times the interquartile range above and below the third and first quartiles, respectively. **Abbreviations:** CRP, C-reactive protein; LNB, Lyme neuroborreliosis, WBC, white blood cell.

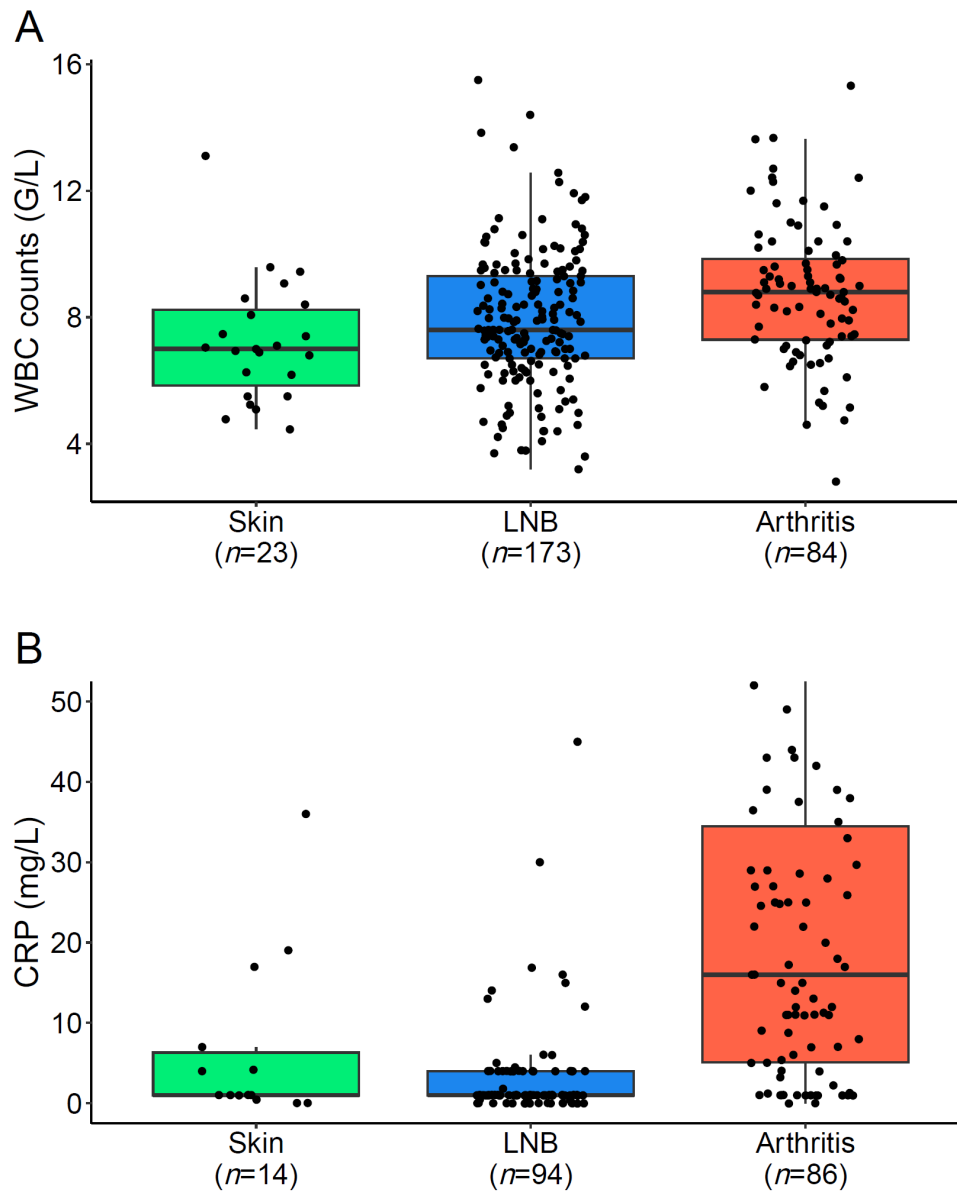

Supplement: mmc1.pdf [file mmc1.pdf]
